# Supplementary material
Source: MDPI journal article supplement (https://www.mdpi.com/1996-1073/10/1/52)
Supplement: s1 [file s1]

# Supplementary Materials: Low-Carbon Energy Development in Indonesia in Alignment with Intended Nationally Determined Contribution (INDC) by 2030

Ucok W.R. Siagian, Bintang B. Yuwono, Shinichiro Fujimori and Toshihiko Masui

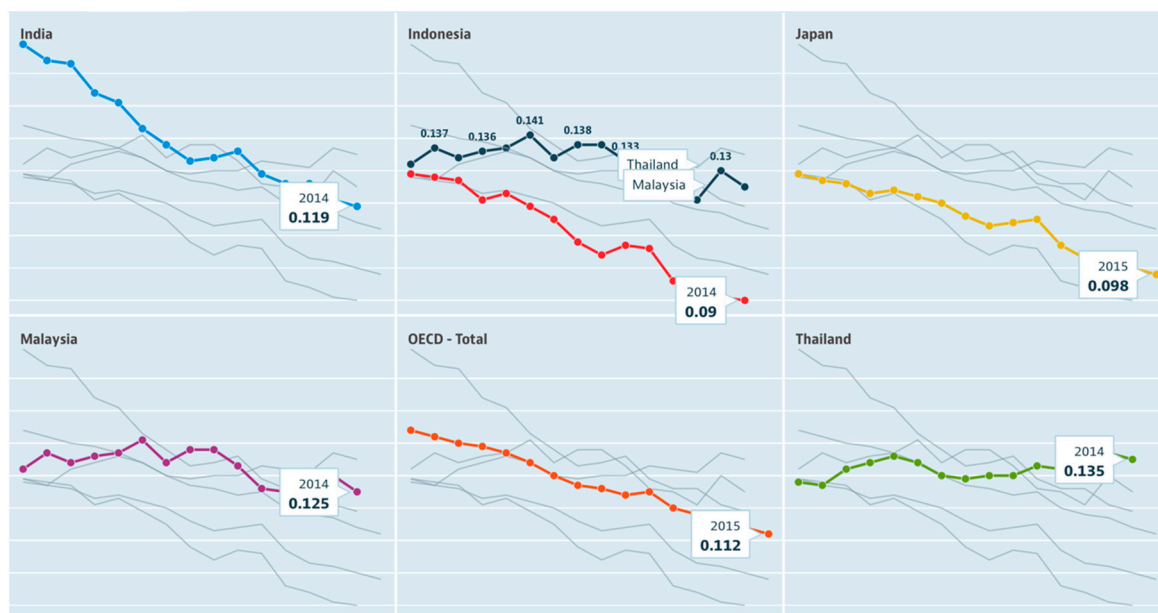

**Figure S1.** Energy Intensity of Countries 2000–2015 (toe/1000 US\$). Source: <https://data.oecd.org/energy/renewable-energy.htm#indicator-chart>.

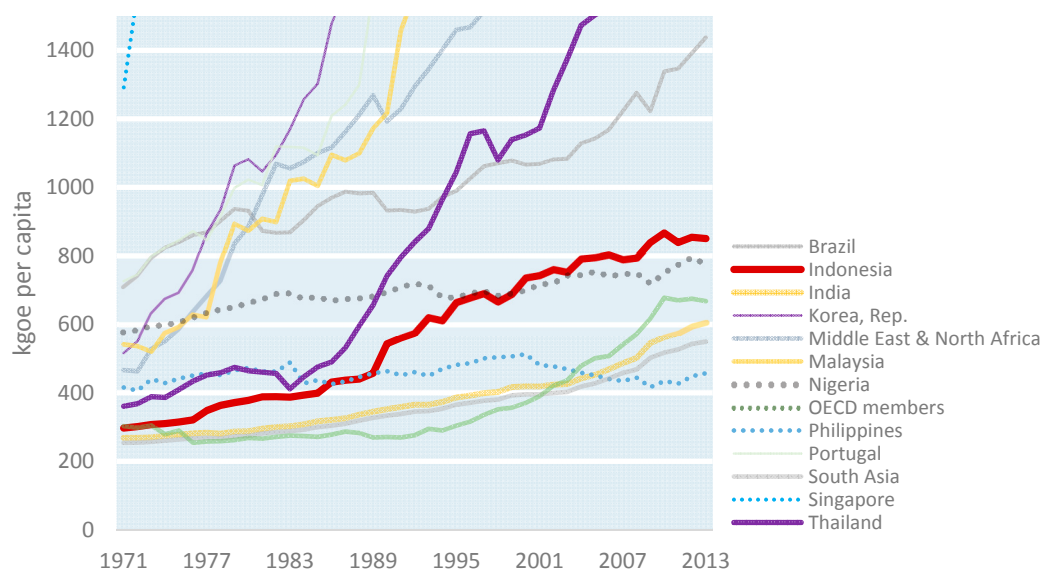

**Figure S2.** Annual Energy Consumption per Capita of Countries 2000–2015 (kgoe/cap). Source: <http://data.worldbank.org/indicator/EG.USE.PCAP.KG.OE>.

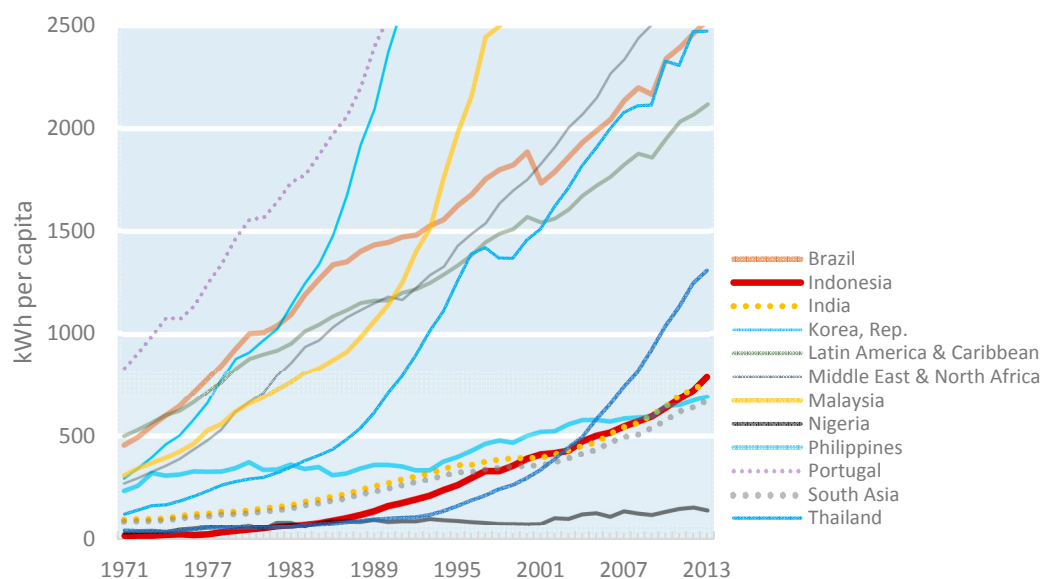

**Figure S3.** Annual Electricity Consumption per Capita of Countries 2000–2015 (kWh/cap). Source: <http://data.worldbank.org/indicator/EG.USE.ELEC.KH.PC>.

**Table S1.** List of sectors.

| Agricultural Sectors        | Energy Supply Sectors                                       | Other Production Sectors               |
|-----------------------------|-------------------------------------------------------------|----------------------------------------|
| Rice                        | Coal mining                                                 | Mineral mining and other quarrying     |
| Wheat                       | Oil mining                                                  | Food products                          |
| Other grains                | Gas mining                                                  | Textiles, apparel, and leather         |
| Oil seed crops              | Petroleum refinery                                          | Wood products                          |
| Sugar crops                 | Coal transformation                                         | Paper, paper products, and pulp        |
| Other crops                 | Biomass transformation (first generation)                   | Chemical, plastic, and rubber products |
| Ruminant livestock          | Biomass transformation (second generation with energy crop) | Iron and steel                         |
| Raw milk                    | Biomass transformation (second generation with residue)     | Nonferrous products                    |
| Other livestock and fishery | Gas manufacture distribution                                | Other manufacturing                    |
| Forestry                    | Coal-fired power                                            | Construction                           |
|                             | Oil-fired power                                             | Transport and communications           |
|                             | Gas-fired power                                             | Other service sectors                  |
|                             | Nuclear power                                               | Carbon capture service                 |
|                             | Hydroelectric power                                         |                                        |
|                             | Geothermal power                                            |                                        |
|                             | Photovoltaic power                                          |                                        |
|                             | Wind power                                                  |                                        |
|                             | Waste biomass power                                         |                                        |
